# Supplementary material for: Differences in Virulence among PVY Isolates of Different Geographical Origins When Infecting an Experimental Host under Two Growing Environments Are Not Determined by HCPro
Source: MDPI journal article supplement (doi:10.3390/plants10061086), 2021-05-28

**Figure S1.** Climatic charts indicating average maximum and minimum temperatures throughout the year of the regions in the countries from which the potato virus Y (PVY) isolates used in this study originated. Upper charts, Scotland (Dundee-Angus region) and Spain (Málaga region), respectively; lower charts, the Monastir and El Kef regions where the Tunisian isolates were sampled.

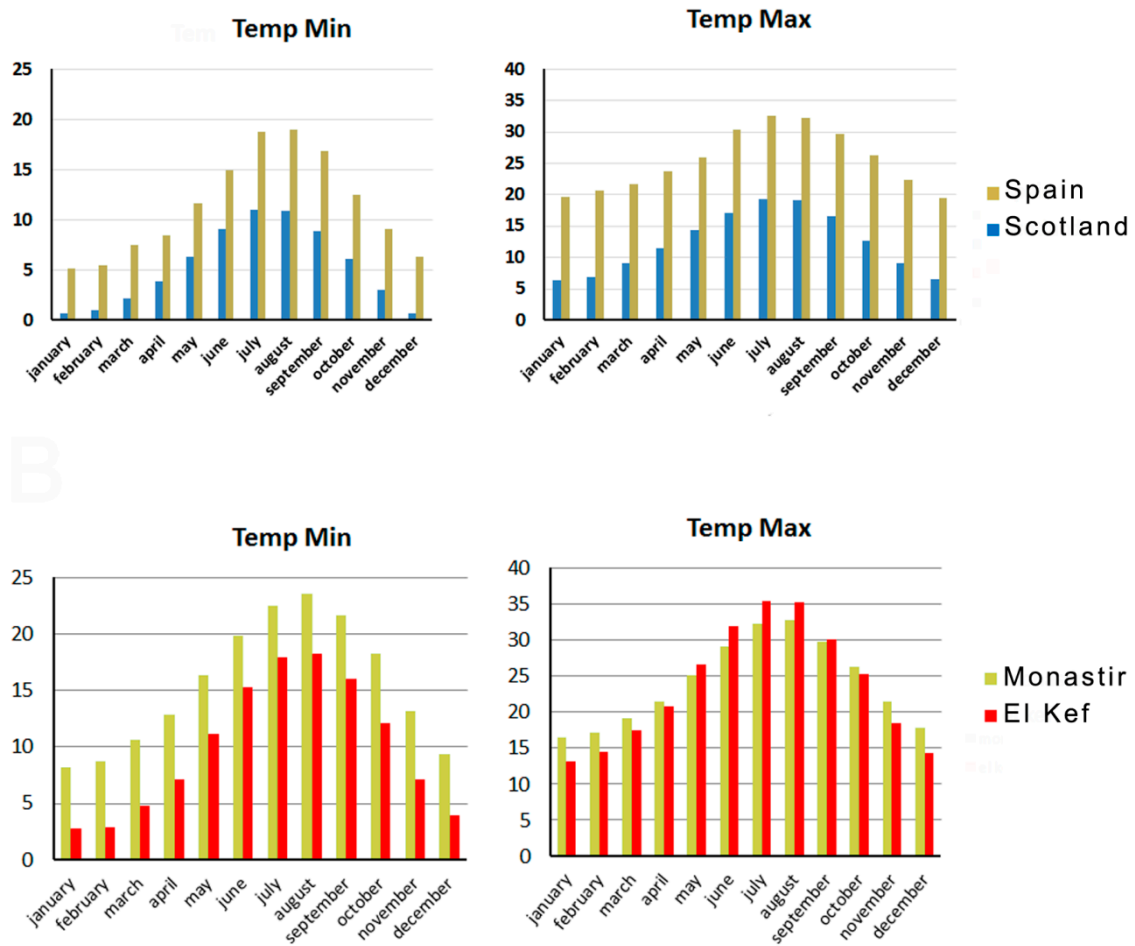

Supplement: s1 [file s1]
